# Supplementary material for: Use of Stress Signals of Their Attached Bacteria to Monitor Sympagic Algae Preservation in Canadian Arctic Sediments
Source: MDPI journal article supplement (doi:10.3390/microorganisms9122626), 2021-12-20
Supplement: s1 [file s1]

Table S1

Depth, coordinates, and concentrations ( $\mu\text{g g}^{-1}$ ) of the main lipids of interest<sup>a</sup> in the different surface sediments investigated.

| Station | Depth | Latitude | Longitude | Brassicasterol  | 24-Methylene<br>Cholesterol | Sitosterol | Palmitoleic<br>acid | Vaccenic<br>acid <sup>c</sup> |
|---------|-------|----------|-----------|-----------------|-----------------------------|------------|---------------------|-------------------------------|
|         | (m)   | (°N)     | (°W)      |                 |                             |            |                     |                               |
| 719     | 1948  | 69.51    | 63.23     | 0.16            | 0.11                        | 0.07       | 3.20                | 0.68                          |
| 600     | 2106  | 70.51    | 62.01     | 1.09            | 0.62                        | 0.89       | 1.82                | 0.74                          |
| 605     | 2017  | 70.49    | 61.58     | 0.65            | 0.37                        | 0.44       | 5.47                | 0.91                          |
| 615     | 617   | 70.50    | 58.47     | 1.06            | 0.43                        | 0.69       | 3.47                | 0.91                          |
| 713     | 1892  | 69.50    | 61.58     | 0.09            | 0.06                        | 0.08       | 1.93                | 2.93                          |
| 707     | 1419  | 69.51    | 59.81     | 1.66            | 0.87                        | 0.89       | 8.11                | 1.73                          |
| Qik     | 360   | 67.47    | 63.79     | 0.11            | 0.11                        | 0.08       | 57.07               | 26.98                         |
| 403     | 1672  | 68.03    | 60.40     | 0.36            | 0.28                        | 0.27       | 0.30                | 0.18                          |
| 409     | 1404  | 68.10    | 58.00     | 1.07            | 0.46                        | 0.47       | 2.39                | 1.40                          |
| 418     | 380   | 68.11    | 56.23     | 2.37            | 0.75                        | 0.38       | 2.76                | 0.53                          |
| 680     | 115   | 69.61    | 138.21    | 0.50            | 0.30                        | 1.10       | 1220.85             | 149.06                        |
| 110     | 385   | 71.70    | 126.48    | 3.00            | 1.50                        | 6.20       | 30.70               | 80.49                         |
| 3       | 811   | 74.48    | 79.75     | 0.12            | 0.03                        | 0.07       | 6.87                | 1.89                          |
| 4       | 347   | 74.27    | 91.77     | 0.28            | 0.45                        | 0.37       | 30.36               | 1.76                          |
| NOW     | 703   | 77.84    | 74.68     | 0.02            | tr                          | 0.23       | 6.90                | 1.14                          |
| 111     | 608   | 76.30    | 73.11     | 0.76            | 0.40                        | 0.23       | 65.87               | 11.20                         |
| 115     | 615   | 76.30    | 71.67     | 0.20            | 0.21                        | 0.08       | 16.28               | 5.29                          |
| 6       | 61    | 69.18    | 100.70    | 1.20            | 0.86                        | 1.11       | 18.54               | 1.11                          |
| 7       | 112   | 69.00    | 106.57    | 0.03            | 0.04                        | 0.03       | 0.32                | 0.99                          |
| 314     | 93    | 69.07    | 106.57    | 0.11            | 0.15                        | 0.13       | 1.99                | 3.04                          |
| 1000    | 362   | 70.60    | 120.92    | 0.02            | 0.01                        | 0.02       | 5.88                | 1.49                          |
| 405b    | 513   | 70.57    | 123       | tr <sup>b</sup> | tr                          | 0.14       | 3.37                | 1.13                          |
| 408     | 168   | 71.32    | 127.65    | tr              | tr                          | 0.01       | 2.62                | 1.72                          |
| 12      | 219   | 69.92    | 122.98    | 0.04            | 0.06                        | 0.09       | 1.65                | 1.70                          |
| 1116    | 184   | 70.05    | 126.29    | 0.01            | 0.01                        | 0.02       | 6.94                | 2.33                          |
| 1122    | 15    | 70.48    | 127.59    | 0.01            | 0.01                        | 0.10       | 13.55               | 1.00                          |
| 434     | 7     | 70.17    | 133.59    | 0.70            | 0.33                        | 0.49       | 426.67              | 34.89                         |
| 1214    | 223   | 70.73    | 127.36    | 0.02            | 0.02                        | 0.03       | 0.24                | 0.82                          |
| 428     | 43    | 70.79    | 133.74    | 0.05            | 0.03                        | 0.06       | 65.33               | 3.83                          |
| 1800    | 352   | 72.20    | 127.82    | 0.16            | 0.16                        | 0.17       | 4.36                | 6.06                          |

<sup>a</sup> Unspecific lipids (such as saturated fatty acids, oleic acid and cholesterol) were not quantified.

<sup>b</sup> tr = traces (concentrations  $< 0.01 \mu\text{g g}^{-1}$ ).

<sup>c</sup> Total (*cis* + *trans*)

Table S2

*Trans*-vaccenic acid/*cis*-vaccenic acid ratio and percentage of 10*S*-DOX product of the different surface sediments investigated.

| Station | <i>Trans</i> -vaccenic acid/ <i>cis</i> -vaccenic acid | 10 <i>S</i> -DOX (%) <sup>a</sup> |
|---------|--------------------------------------------------------|-----------------------------------|
| 719     | 0.02                                                   | 1.0                               |
| 600     | 0.02                                                   | 5.6                               |
| 605     | 0.02                                                   | 6.4                               |
| 615     | 0.01                                                   | 3.0                               |
| 713     | 0.01                                                   | 0.0                               |
| 707     | 0.05                                                   | 12.4                              |
| Qik     | 0.23                                                   | 26.8                              |
| 403     | 0.06                                                   | 6.2                               |
| 409     | 0.06                                                   | 20.0                              |
| 418     | 0.02                                                   | 22.1                              |
| 680     | 0.22                                                   | 5.2                               |
| 110     | 0.46                                                   | 2.2                               |
| 3       | 0.12                                                   | 22.8                              |
| 4       | 0.15                                                   | 29.0                              |
| NOW     | 0.16                                                   | 29.7                              |
| 111     | 0.04                                                   | 18.3                              |
| 115     | 0.13                                                   | 24.8                              |
| 6       | 0.20                                                   | 9.4                               |
| 7       | 0.22                                                   | 26.2                              |
| 314     | 0.18                                                   | 13.9                              |
| 1000    | 0.11                                                   | 15.0                              |
| 405b    | 0.12                                                   | 6.3                               |
| 408     | 0.12                                                   | 17.0                              |
| 12      | 0.35                                                   | 18.3                              |
| 1116    | 0.24                                                   | 17.5                              |
| 1122    | 0.20                                                   | 10.0                              |
| 434     | 0.07                                                   | 10.0                              |
| 1214    | 0.12                                                   | 6.6                               |
| 428     | 0.36                                                   | 14.0                              |
| 1800    | 0.09                                                   | 20.5                              |

<sup>a</sup> Percentage of 10*S*-hydroxyhexadec-8(*trans*)-enoic acid relative to residual palmitoleic acid and its abiotic oxidation products.
